# Supplementary material for: PPBP gene as a biomarker for coronary heart disease risk in postmenopausal Thai women
Source: PeerJ. 2022 Jun 17;10:e13615. doi: 10.7717/peerj.13615 (PMC9208370; doi:10.7717/peerj.13615)
Supplement: Supplemental Information 3 [file peerj-10-13615-s003.xlsx]

## Sheet: Clinical Data
case no.	group		lipid (mg/dL)					CBC
		Age	Cholesterol	Triglyceride	HDL	LDL	LDL-C direct	WBC(10'3/uL)	RBC(10'3/uL)	Hb(g/dL)	HCT(%)	PLT	NEUT	LYMPH(%)	MONO(%)	EO	BASO
1	H+D	58	202	90	90	94	115	2.5	4.19	12.3	37.5	221	55.1	50	5	1.7	0.9
2	N	56	196	266	40	103	134	6.6	2.36	7.3	21.2	355	35	59	4	1	1
3	N	55	228	125	49	154	173	4.7	3.68	11	31.9	185	57	30.9	6.7	2.6	0.7
4	N	42	201	171	48	119	138	8.6	3.95	11.8	33.8	406	66.3	21.1	5.8	4.9	0.5
5	N	55	194	228	51	97	130	8	5.16	10.9	33.4	283	58.2	30.2	6.3	3.1	0.5
6	H	56	277	94	86	172	195	5.6	3.58	10.5	31.9	292	55.1	34.8	6.2	2.1	0.2
7	H	60	219	307	36	122	158	7.7	4.35	13.8	38.6	335	58.8	30.2	6.1	2.7	0.5
8	N	57	208	93	65	124	139	7.7	4.92	9.7	28.2	213	46.5	42.5	4.8	3.1	0.7
9	H	62	241	161	52	157	184	7.5	4.54	14	39.7	221	52.1	39.6	4.8	1.7	0.7
10	H	52	261	425	53	123	190	6.9	4.64	12.2	33.8	232	47.9	41.4	4.8	3.7	0.4
11	N	60	201	169	46	121	137	8	4.71	12.4	37.1	298	51.8	38	6	1.7	0.5
12	N	56	170	146	61	80	102	5.5	3.61	12.3	36.1	209	37.2	48.2	9.3	2.2	0.7
13	H	66	207	119	55	128	147	7	4.45	13	37.8	345	53	3.2	4.8	3.6	0.5
14	N	56	168	155	49	88	99	6	3.67	29.8	81.3	177	49.8	41.1	4.9	1.8	0.9
15	N	63	186	222	43	99	127	5.9	5.03	13.1	77	263	60.1	5.5	2.3	2.3	0.7
16	H	47	227	201	49	138	162	6.8	2.91	8.5	25.4	397	56.9	33.1	5.9	2.3	0.3
17	H	72	316	330	50	200	247	7.9	4.69	14.2	41.8	286	36.7	53.7	5	1.4	0.5
18	H	56	241	154	73	137	158	6.3	4.01	12.2	35.4	304	52.6	37.8	4.8	2.6	0.5
19	N	55	226	53	116	99	120	4.5	3.45	10.2	30.2	312	38.2	45.4	5.8	7.3	1
20	H	58	254	252	46	158	192	7.6	4.65	13.5	39.9	325	58.3	7.6	4.65	1.6	0.5
21	H	57	260	208	98	120	164	6.5	4.04	0.8	31	333	50.2	40.6	5.1	1.6	0.6
22	H	59	242	48	72	60	181	4.1	3.71	11.9	34.5	225	33	54	6	2	2
23	H	54	242	265	51	138	171	8.1	4.19	12.3	36.9	309	40.7	47.7	5.7	3.4	0.6
24	N	49	196	163	59	104	129	5.4	4.33	13	38.4	321	51.5	37.7	6.1	1.5	0.9
25	H	60	214	94	39	156	184	5.1	4.61	13.7	40.5	287	53.3	36.8	5.5	1.9	0.6
26	H	55	244	136	81	136	160	7.5	4.18	12.5	36.2	253	47	47	4	1	0
27	H	55	251	248	55	146	174	4.2	4.97	14.8	42.9	415	38	54	5	2	1
28	H+D	49	174	35	4	83		5.9	3.51	10.5	31.1	296	56.5	35.5	4.8	1.5	0.4
29	H+D	58	207	101				7.2	4.74	12.7	41	325	52.4	34.5	7.5	2.6	0.6
30	CAD	53	171	127	54	92	110	6.1	4.66	13.9	39.8	273	48.5	40.5	6.3	1.7	0.7
31	H+D	61	226	234	39	140		6.7	4.72	14.1	43.8	390	64	26	7	1	0
32	H+D	63	113	199	46	109		4.5	4.72	13.1	41.1	234	67	26.7	4.1	1.5	0.7
33	H+D	58	191	106	5	105		6.1	4.48	14.1	41.9	297	44	40	5	3	0
34	H+D	63	172	62	74	86		5.8	4.89	14.5	43.9	213	59.9	31.1	5.3	3.1	0.6
35	H+D	57	192	65	101	78		3.9	4.77	15.5	46.1	214	61.6	28.3	7.3	2.3	0.5
36	H+D	45	217	134	62	125		8	5.08	13.1	41.6	290	69.7	25.2	4.1	0.8	0.2
37	CAD	59	196	229	46	104		6.7	4.81	14.7	44.6	357	49.5	43.3	4.3	2.4	0.5
38	H+D	54	208	228	65	97		5.1	5.43	15.7	46.8	373	59	30.8	5.8	3.2	1.2
39	CAD	62	219	63	97	109		5	4.58	12.1	37.2	204	36	48	6	3	1
40	H+D	59	185	51	71	104		5.6	4.93	13.2	39.6	303	58	33	4	4	0
41	H+D	55	177	124	51	101		8.1	5.1	14.5	44.2	284	55.9	35.3	6.2	2.2	0.4
42	H+D	66	221	120	88	109	128	4.1	4.66	15.2	45.2	144	56.6	37.2	4.5	1.2	0.5
43	H+D	63	174	75	65	94		4.8	4.88	14.3	42.3	148	43	44	8	1	0
44	H+D	50	124	70	56	54		3.8	6.25	18	54.3	144	45	47	2	5	0
45	H+D	59	221	82	70	135	146	6	4.48	3.6	40.8	298	59.8	35	4.3	0.9	0
46	H+D	59	195	46	82	104		5.3	4.44	13.5	40.6	398	58.8	33.5	5.6	1.4	0.7
47	H+D	54	19	105	55	93		7.8	6.03	14.1	43	283	42	50	4	3	0
48	H+D	59	187	98	68	99		4.5	5.64	1	50.2	171	52.2	38	6.6	2.6	0.6
49	H+D	56	222	162	60	130		6.5	4.54	13.8	41.2	162	58	35.6	4.8	1.1	0.5
50	H+D	64	281	114	79	179		5.1	4.56	14.2	42.4	245	49	45.5	3.4	1.9	0.2
51	H+D	62	228	142	55	145		3.8	4.12	12.9	38.9	188	38	44	9	4	2
52	H+D	56	185	118	92	69		5	4.32	12.7	38.5	258	50.3	42.8	5.5	1.1	0.3
53	H+D	58	168	132	48	94		5.4	3.62	11.1	33.2	412	53.3	37.7	5.7	2.5	0.8
54	H+D	60	184	90	85	81		6.6	5.21	15.8	47.3	257	62	25.9	5.2	6.5	0.4
55	H	57	226	177	39	152	159	7.4	4.34	13.6	41	206	39	41	5	5	3
56	H+D	57	226	204	46	139		5.3	3.57	10.9	32.4	228	64.2	26.9	6.4	1.6	0.9
57	H+D	61	179	172	59	86		5.4	4.13	12.7	37.9	291	50.6	40	7.8	1.1	0.5
58	H+D	58	216	78	68	132		6	4.64	13.3	41.2	141	61.7	27.6	7.4	2.8	0.5
59	H+D	57	171	75	65	91		4.7	4.39	13	39.3	300	53.5	33.7	5.2	7.1	0.5
60	H+D	58	186	119	61			9.2	4.83	14.9	46	329	70	23	1	5	0
61	H	47	246	145	57	160	184	5.9	5.49	14.6	44.6	275	60.9	31.8	3.3	3.2	0.8
62	H+D	57	209	92	67	124		5.9	4.98	14.6	44.3	286	46.2	39	4.4	8.5	1.9
63	H+D	53	181	89	90	73		4.1	4.58	13.7	41.1	188	57.1	32.5	8.8	1.3	0.3
64	H+D	60	185	171	48	103		6	5.35	15.5	47.5	254	54	27	9	3	2
65	H+D	66	226	140	93	105		5.4	6.26	13.2	41.6	256	63.7	27.5	6.2	1.9	0.7
66	H+D	57	199	186	55	107		5.1	4.61	14.2	42.4	239	43	36	10	3	0
67	H+D	64	199	285	49	93		6	5.49	16.2	49.8	233	40	48	7	1	0
68	N	45	141	86	56	68	84	6	4.57	13.3	40.6	257	67	20	4	5	0
69	H+D	58	150	146	45	76		4.7	5.28	16.7	50.1	178	70	17	4	7	0
70	H+D	58	139	100	63	56		5.7	4.27	12.9	38.1	221	64	28.9	4.2	2.6	0.3
71	H+D	62	185	241	47	90		7.1	5.48	16.8	50.9	185	59.9	29.5	7.4	2.8	0
72	CAD	67	187	117	80	84	91	7.3	3.8	11.6	35.2	265	51.6	39.7	5.3	3	0.4
73	CAD	59	181	171	47	100	121	6.9	4.62	13.3	41.2	282	48.4	40.9	7.9	2.3	0.5
74	CAD	81	104	275	43	6	29	9.6	3.9	12.1	36.7	302	61.2	27.7	7.4	2.7	1
75	CAD	87	147	163	54	60	83	6.1	5.37	13.4	40.9	195	69.4	24.3	5.3	0.5	0.5
76	CAD	73	162	85	56	89	98	4.7	4.41	13.2	39.9	233	46	27.6	7.4	17.9	1.1
77	CAD	69	141	91	46	77		7.6	4.95	14.1	46.2	198	55	33.2	8.3	1.7	1
78	CAD	71	180	225	49	86	95	5	3.99	10.8	34	270	53.3	35.8	8.6	1.1	1.2
79	CAD	65	369	577	18	236	118	5.7	3.82	11.3	34.1	358	50	34	12	1	1
80	CAD	75	137	92	53	66	78	5.6	4.23	12.8	39	198	56.1	29.8	10.1	3.4	0.6
81	CAD	66	261	116	63	175	195	7.3	2.84	8	24.8	388	77	10	6	1	1
82	CAD	69	148	94	55	74	87
83	CAD	79	133	111	54	57	72	7.4	4.2	12	36.5	177	66.6	19.5	6.9	6.3	0.7
84	CAD	88	141	233	35	59	78	5.8	4.4	11.1	34.8	171	51.2	37.7	6.1	4.4	0.6
85	CAD	73	157	125	87	45	58	6.5	3.34	10.5	32.3	227	62.3	29.3	6.1	1.9	0.4
86	CAD	46	136	139	48	60	71	6.5	4.87	14.1	43.4	155	63.6	28.5	6.2	0.9	0.8
87	CAD	64	166	86	64	85	92	6.3	4.61	13.5	41	232	68.6	26.4	3.7	0.9	0.4
88	CAD	76	133	216	48	42	64	5.7	4.46	13	39.9	227	47.7	37.3	7.2	7.4	0.4
89	CAD	86	188	81	57	115	128	5	4.18	12.9	39.7	224	67.9	19.3	7.7	4.7	0.4
90	H	56	233	105	84	128	154	5.2	6.02	12.4	40.7	283	56.9	37.2	4.1	1.6	0.2

## Sheet: qRT-PCR
case no.	group	PPBP gene	DEFA1/3
1	H+D	0.270744	0.249135
2	N	1	1
3	N	0.268874	8.02777
4	N	0.418994	0.336808
5	N	0.630689	14.3204
6	H	1.34257	1.69937
7	H	1.68763	2.57576
8	N	0.962594	1.89868
9	H	0.885768	2.76063
10	H	2.28945	2.95878
11	N	1.23542	0.891929
12	N	0.435275	4.67511
13	H	0.532185	3.06312
14	N	0.949342	12.5533
15	N	0.265172	2.82843
16	H	1.30134	3.86375
17	H	1.38032	2.43682
18	H	0.744839	1.16473
19	N	1.44393	0.99654
20	H	0.773782	3.82378
21	H	0.479632	2.90795
22	H	0.556711	0.768438
23	H	0.328736	1.87254
24	N	0.744839	36.1269
25	H	0.241484	0.20166
26	H	0.17254	0.236514
27	H	0.537747	2.19619
28	H+D	0.503478	0.49827
29	H+D	0.72951	0.45219
30	CAD	0.0921418	0.29937
31	H+D	0.190122	0.384219
32	H+D	0.125869	0.249135
33	H+D	0.0665231	0.348686
34	H+D	0.17739	0.646176
35	H+D	0.399149	0.221442
36	H+D	0.809442	0.556711
37	CAD	0.174343	1.24401
38	H+D	0.102593	0.501736
39	CAD	0.245705	0.353553
40	H+D	0.176165	0.185565
41	H+D	0.116226	0.626332
42	H+D	0.25437	0.302499
43	H+D	0.10083	0.0174576
44	H+D	0.517632	0.239816
45	H+D	0.130761	0.803851
46	H+D	0.907519	4.28709
47	H+D	0.413225	0.230846
48	H+D	0.290176	1.32869
49	H+D	0.411796	0.278355
50	H+D	1.03168	1.33793
51	H+D	1.56917	0.635075
52	H+D	1.47939	1.23114
53	H+D	5.85634	3.22657
54	H+D	2.24233	7.88986
55	H	2.57576	6.16884
56	H+D	2.47084	6.52058
57	H+D	5.22344	7.3615
58	H+D	15.3482	7.08614
59	H+D	15.8895	2.19619
60	H+D	12.9063	21.781
61	H	3.5801	1.49485
62	H+D	2.23457	15.7797
63	H+D	6.56593	0.367292
64	H+D	11.3924	1.53156
65	H+D	7.31065	4.83998
66	H+D	21.1854	7.72749
67	H+D	5.67649	1.37078
68	N	3.50642	11.7942
69	H+D	7.6211	17.0299
70	H+D	3.64268	0.72951
71	H+D	2.40327	7.91725
72	CAD	1.85318	0.449066
73	CAD	10.3388	0.739694
74	CAD	8.87656	19.8353
75	CAD	11.5915	0.993092
76	CAD	3.81055	0.716978
77	CAD	5.25977	0.377618
78	CAD	11.432	3.69353
79	CAD	10.091	0.879649
80	CAD	5.61778	22.0087
81	CAD	3.00008	0.675955
82	CAD	25.0198	2.78949
83	CAD	4.09823	1.42405
84	CAD	0.846745	3.93128
85	CAD	2.02792	4.69134
86	CAD	23.8348	46.0459
87	CAD	9.64646	10.9283
88	CAD	13.6895	0.287175
89	CAD	6.10504	7.70076
90	H	7.26015	1.18099

## Sheet: ELISA
case no.	group	PPBP (ng/ml)	HNP1-3 (ng/ml)
1	H+D	570.947	2.50333
2	N	611.737	2.62556
3	N	585.158	5.28111
4	N	566.211	7.50333
5	N	588.842	3.71444
6	H	1032.35	4.02556
7	H	1354.81	3.49222
8	N	425.421	2.90333
9	H	1215.16	3.15889
10	H	583.579	5.71444
11	N	476.737	7.28111
12	N	279.632	2.61444
13	H	1492.7	5.62556
14	N	361.474	4.05889
15	N	944.632	2.27
16	H	1300.42	3.41444
17	H	1476.91	3.67
18	H	1220.95	4.10333
19	N	661.737	1.40333
20	H	1508.32	4.20333
21	H	1428.49	3.12556
22	H	1236.04	1.85889
23	H	1065.16	1.40333
24	N	68.8421	2.64778
25	H	1402	4.15889
26	H	1383.05	1.44778
27	H	1554.98	1.87
28	H+D	1484.46	3.63667
29	H+D	1388.84	4.13667
30	CAD	633.053	4.69222
31	H+D	846.386	12.6256
32	H+D	655.86	3.83667
33	H+D	748.14	4.68111
34	H+D	622	9.05889
35	H+D	575.684	6.21444
36	H+D	891.474	7.12556
37	CAD	583.842	4.67
38	H+D	931.298	3.55889
39	CAD	556.912	2.93667
40	H+D	429.719	3.31444
41	H+D	569.544	7.55889
42	H+D	477.965	4.45889
43	H+D	382.175	5.18111
44	H+D	319.544	2.95889
45	H+D	694.456	3.93667
46	H+D	694.982	4.95889
47	H+D	586.211	2.22556
48	H+D	598.491	3.02556
49	H+D	789.018	4.78111
50	H+D	850.947	4.69222
51	H+D	822.175	6.53667
52	H+D	853.404	2.39222
53	H+D	863.053	1.90333
54	H+D	843.579	4.11444
55	H	824.281	11.1144
56	H+D	849.895	3.19222
57	H+D	873.93	2.67
58	H+D	813.754	2.72556
59	H+D	836.912	3.98111
60	H+D	895.684	10.3589
61	H	747.439	2.23667
62	H+D	900.421	7.57
63	H+D	799.719	4.02556
64	H+D	872.175	49.6144
65	H+D	861.825	7.71444
66	H+D	843.579	23.3033
67	H+D	852	40.2183
68	N	732	3.69222
69	H+D	819.895	3.64778
70	H+D	840.596	3.27
71	H+D	857.088	12.0811
72	CAD	845.333	5.62556
73	CAD	780.07	2.63667
74	CAD	875.509	5.27
75	CAD	338.316	2.50333
76	CAD	829.719	1.81444
77	CAD	887.263	3.45889
78	CAD	860.421	2.03667
79	CAD	772	1.74778
80	CAD	1492.7	3.54778
81	CAD	1240.42	3.91444
82	CAD	1095.51	42.4628
83	CAD	823.754	4.10333
84	CAD	985.509	3.89222
85	CAD	705.333	31.1811
86	CAD	1109.72	3.24778
87	CAD	1009.54	5.82556
88	CAD	1114.81	3.67
89	CAD	1351.65	5.32556
90	H	1151.65	6.81444
